# Supplementary material
Source: PubMed Central journal article supplement (PMC6097011)
Supplement: ddy193_supp.pdf [file ddy193_supp.pdf]

## **Supplemental Information**

### **5-hydroxymethylcytosine alterations in the human postmortem brains of autism spectrum disorder**

Ying Cheng<sup>1</sup>, Ziyi Li<sup>2</sup>, Sasicha Manupipatpong<sup>1</sup>, Li Lin<sup>1</sup>, Xuekun Li<sup>3</sup>, Tianlei Xu<sup>4</sup>, Yong-hui Jiang<sup>5</sup>, Qiang Shu<sup>3</sup>, Hao Wu<sup>2</sup>, Peng Jin<sup>1,\*</sup>

<sup>1</sup>Department of Human Genetics, Emory University School of Medicine, Atlanta, GA 30322, USA;

<sup>2</sup>Department of Biostatistics and Bioinformatics, Rollins School of Public Health, Emory University, Atlanta, GA 30322, USA;

<sup>3</sup>The Children's Hospital and Institute of Translational Medicine, School of Medicine, Zhejiang University, Hangzhou, China 310029;

<sup>4</sup>Department of Mathematics and Computer Science, Emory University, Atlanta, GA 30322, USA;

<sup>5</sup>Department of Pediatrics, Duke University School of Medicine, Durham, NC 27710, United States; Department of Neurobiology, Duke University School of Medicine, Durham, NC 27710, United States; University Program in Genetics and Genomics, Duke University School of Medicine, Durham, NC 27710, USA.

| Patient ID           | Total Reads # | % of Alignment | Age | Gender | Group         |
|----------------------|---------------|----------------|-----|--------|---------------|
| <b>Control group</b> |               |                |     |        |               |
| 451                  | 44,668,515    | 95.67          | 4   | M      | <b>Young</b>  |
| 4327                 | 75,105,434    | 92.82          | 5   | F      |               |
| 616                  | 38,340,897    | 61.97          | 12  | M      |               |
| 2149                 | 57,972,549    | 73.19          | 16  | M      |               |
| 1409                 | 37,454,869    | 67.25          | 18  | M      |               |
| 4271                 | 34,232,319    | 70.61          | 19  | M      | <b>Middle</b> |
| 5251                 | 47,087,627    | 71.99          | 19  | M      |               |
| 1442                 | 26,703,654    | 80.54          | 24  | M      |               |
| 1455                 | 25,334,592    | 77.55          | 25  | M      |               |
| 1981                 | 30,662,106    | 71.66          | 25  | M      |               |
| 5873                 | 29,502,164    | 70.01          | 28  | M      |               |
| 1324                 | 31,411,904    | 66.33          | 29  | M      |               |
| 5079                 | 117,444,657   | 94.91          | 33  | M      |               |
| 3253                 | 19,437,149    | 83.64          | 40  | F      | <b>Old</b>    |
| 7333                 | 33,741,537    | 76.61          | 41  | M      |               |
| 4781                 | 31,233,175    | 94.13          | 45  | M      |               |
| 7119                 | 56,579,404    | 71.54          | 48  | M      |               |
| 6259                 | 26,660,508    | 65.98          | 50  | M      |               |
| 6206                 | 20,206,052    | 64.36          | 54  | M      |               |
| <b>ASD group</b>     |               |                |     |        |               |
| 4671                 | 46,075,726    | 92.23          | 4   | M      | <b>Young</b>  |
| 5308                 | 56,995,682    | 92.08          | 4   | M      |               |
| 7014                 | 64,538,681    | 82.34          | 11  | M      |               |
| 4899                 | 16,622,004    | 41.88          | 14  | M      |               |
| 3924                 | 30,660,924    | 63.69          | 16  | F      |               |
| 4099                 | 34,801,879    | 39.36          | 19  | M      | <b>Middle</b> |
| 7436                 | 55,858,514    | 88.07          | 24  | M      |               |
| 4166                 | 41,910,193    | 80.99          | 24  | M      |               |
| 6994                 | 22,589,918    | 64.06          | 29  | M      |               |
| 3845                 | 42,874,575    | 67.38          | 30  | M      |               |
| 5297                 | 65,721,856    | 85.99          | 33  | M      |               |
| 1977                 | 22,764,279    | 75.52          | 38  | M      | <b>Old</b>    |
| 5115                 | 46,074,219    | 94.47          | 46  | M      |               |
| 7085                 | 35,918,642    | 86.97          | 49  | F      |               |
| 7109                 | 55,327,128    | 66.24          | 51  | M      |               |
| 7376                 | 22,853,932    | 76.37          | 52  | F      |               |
| 7459                 | 16,573,163    | 86.94          | 54  | M      |               |

Figure S1. Sample information of 19 Controls and 17 ASD patients.

**A**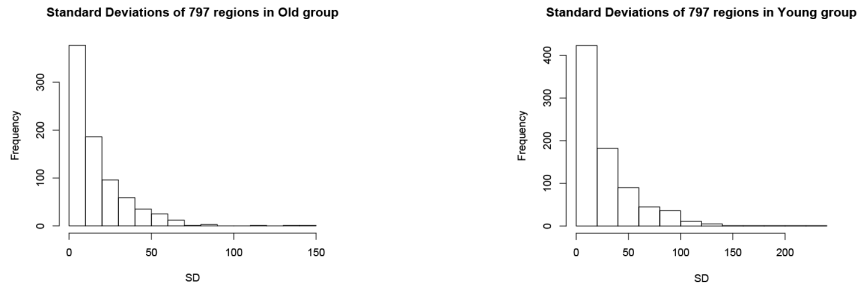**B**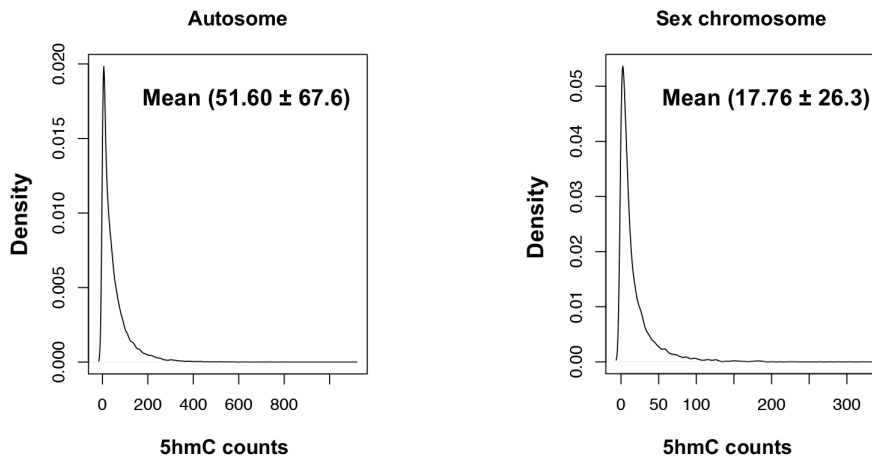**C**

| MARKER    | MARKER LOCATION | ASSOCIATED REGION (CLUMP) | GENES IN REGION                                 |
|-----------|-----------------|---------------------------|-------------------------------------------------|
| rs4392770 | chr7:72213451   | chr7:72022225..72417063   | MIR4650-1 MIR4650-2 POM121 SBDSP1 SPDYE7P TYW1B |
| rs7024761 | chr9:115096346  | chr9:114918772..115147463 | HSDL2 MIR3134 PTBP3 SUSD1                       |
| rs2564899 | chr9:114857260  | chr9:114832028..114888773 | MIR3134 SUSD1                                   |

**Figure S2. Characterization of 797 DhMRs in young group ASD cerebellum.**

(A) Histogram plot of the standard deviations (SD) of the 797 regions in old group (left, mean of SDs: 16.7) and young group (right, mean of SDs: 27.9).

(B) Numbers of 5hmC reads are higher in autosome (Mean  $\pm$  SD = 51.60  $\pm$  67.6) than in sex chromosome (Mean  $\pm$  SD = 17.76  $\pm$  26.3).

(C) ASD risk SNPs that overlapped with DhMRs.

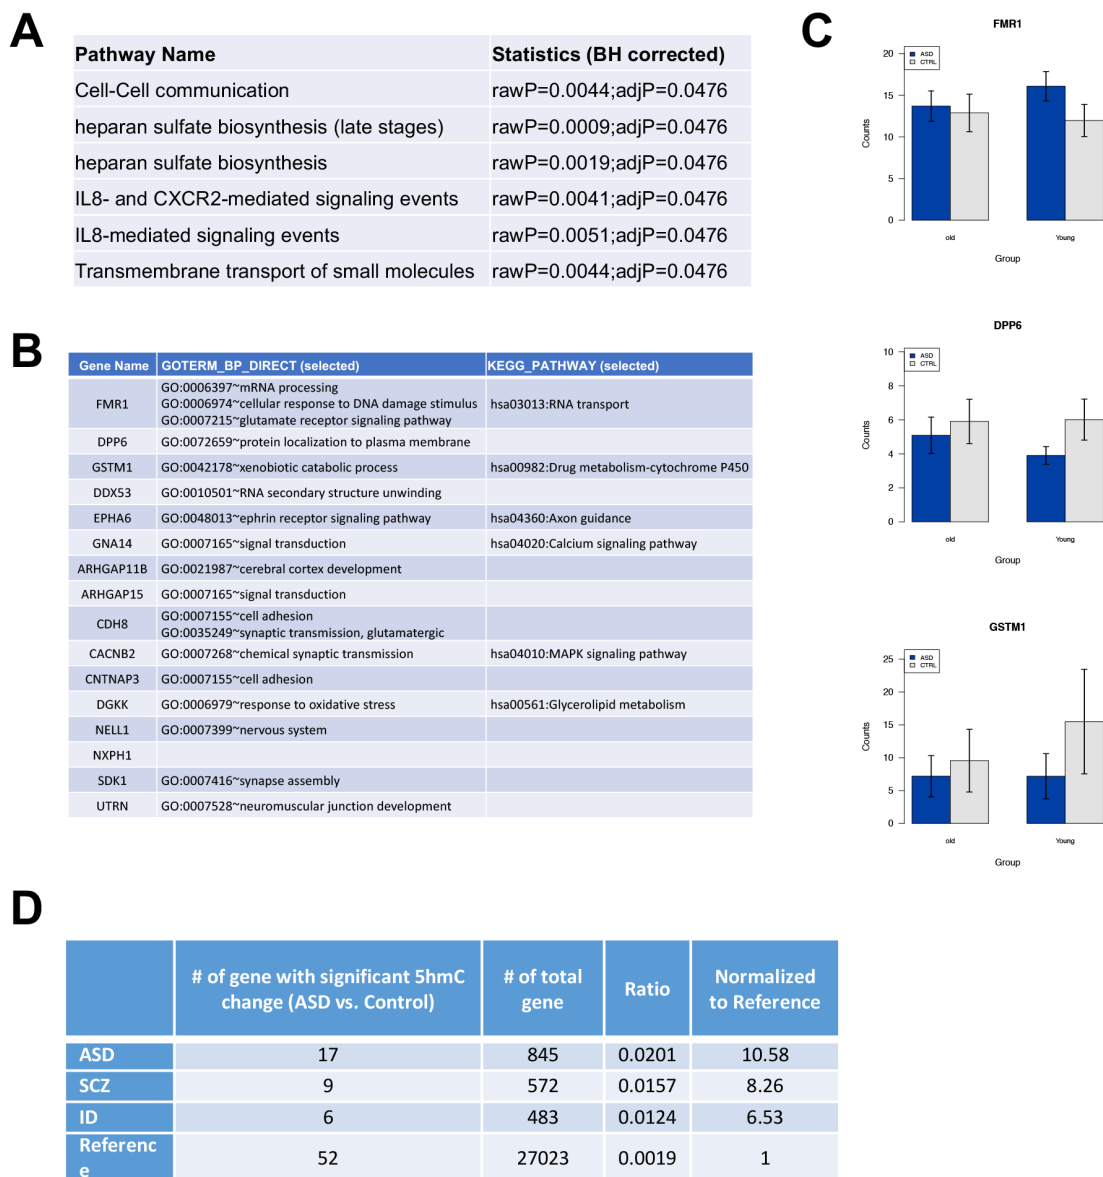

**Figure S3. Gene ontology analysis of DhMRs-associated genes.**

(A) Pathway analysis of 181 DhMRs-associated genes.

(B) 16 ASD risk genes with intragenic DhMRs involve in different biological process and pathways.

(C) 5hmC distribution patterns of DPP6, GSTM1 and FMR1 in young group and old group.

(D) 5hmC changes in the  $\pm 10$ kb region of psychiatric genes. By using DSS, we compared 5hmC counts (ASD vs. Control samples) in the  $\pm 10$ kb region of psychiatric genes., including ASD, schizophrenia (SCZ) and intellectual disorders (ID) risk genes.

### Disease association analysis

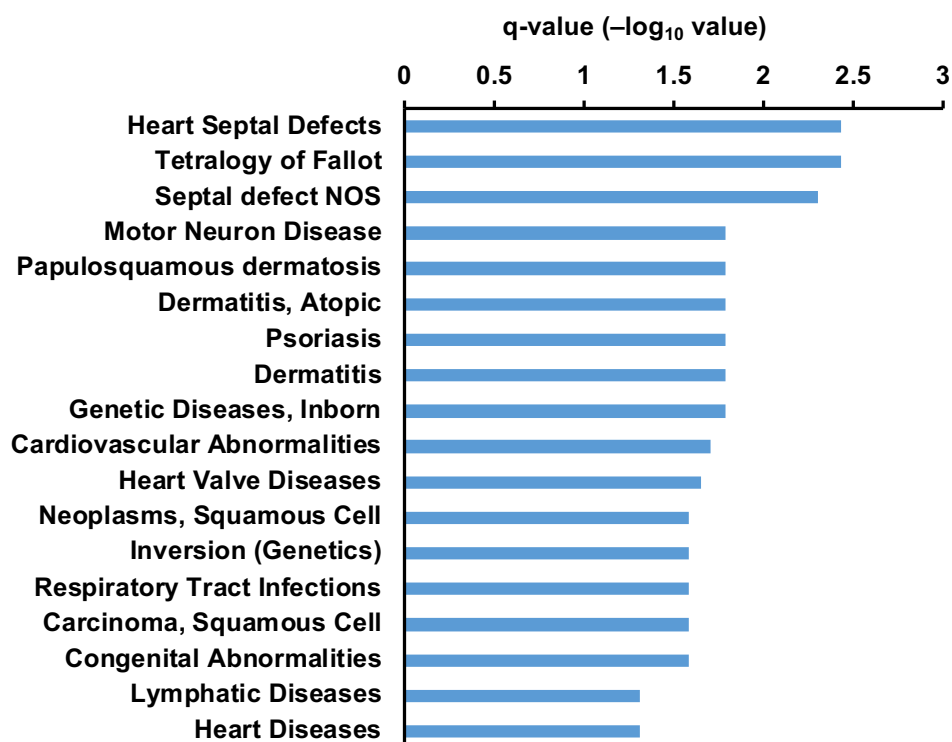

**Figure S4. Disease association analysis of protein-coding genes (with enhancer in 100kb from TSS).**

### Disease association analysis

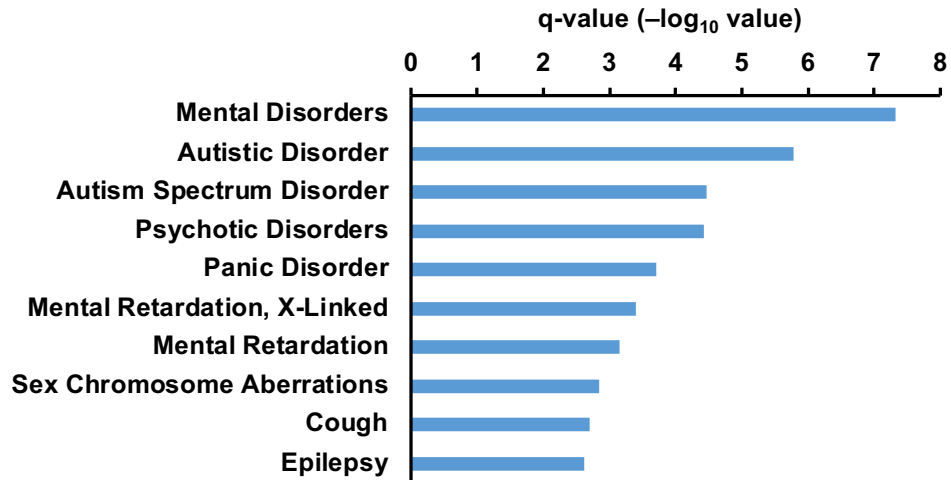

### Pathway analysis

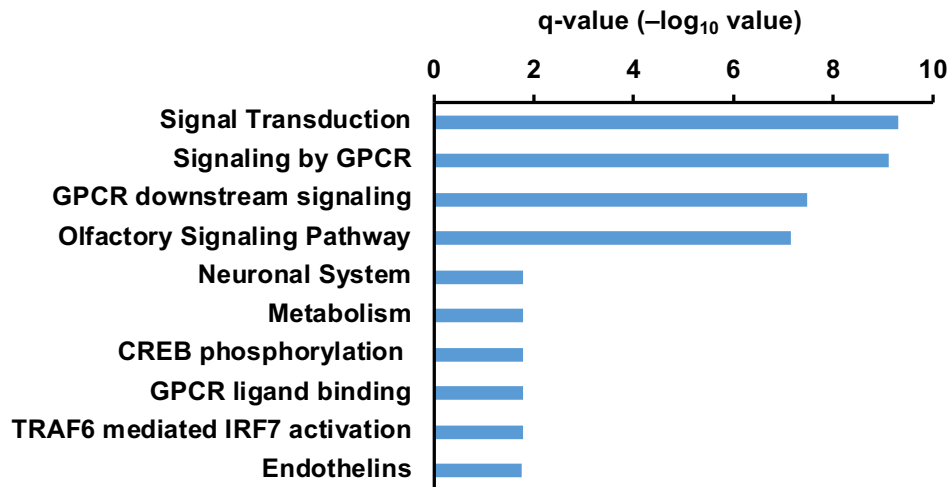

Figure S5. Disease association and Pathway analysis of 329 intergenic DhMR-associated genes identified from TAD Pathway analysis.
